# Supplementary material for: Seroprevalence of the SARS-CoV-2 antibody in healthcare workers: a multicentre cross-sectional study in 10 Colombian cities
Source: HighWire-hosted journal article supplement (doi:10.1136/oemed-2021-107487), 2021-11-05
Supplement: oemed-2021-107487supp001_data_supplement.pdf [file oemed-2021-107487supp001_data_supplement.pdf]

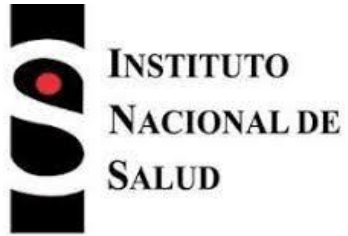

# COVID-19 y su transmisión en ambientes laborales, Colombia 2020

El presente cuestionario hace parte del proyecto "Caracterización de las condiciones de trabajo y prácticas asociadas a la infección secundaria por SARS-CoV-2 en trabajadores de la salud en Colombia, 2020."

**\*Obligatorio**

1. Dirección de correo electrónico \*

---

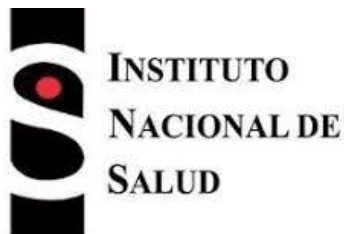

## Consentimiento informado

Este documento le proporciona la información necesaria para que usted participe voluntaria y libremente en el proyecto de investigación realizado liderado por el Instituto Nacional de Salud en el que participan más de nueve instituciones académicas y agencias gubernamentales.

Antes de dar su consentimiento, usted necesita entender plenamente el propósito de su decisión. Este proceso se denomina consentimiento informado. Una vez que usted haya leído este documento y decida voluntariamente participar en el estudio, se le pedirá que acepte al final del presente consentimiento con un SI y al finalizar la encuesta, pida el envío de una copia a su correo.

Justificación del estudio: La actual epidemia del nuevo coronavirus SARS-CoV-2 (enfermedad por coronavirus 2019; Covid-19), originada en la República de China, se ha extendido hacia muchos países con crecimiento acelerado de las notificaciones de nuevos casos. La alta transmisibilidad del virus representa un reto para la salud pública.

En países en desarrollo, el desafío para enfrentar una pandemia es mayor debido a las limitaciones en recursos económicos y técnicos.

Ante esta situación de emergencia, se hace necesario gestionar las medidas de prevención y control, de acuerdo al esquema de jerarquización establecido en el artículo 2.2.4.6.24 (Decreto 1072, 2015 MinTrabajo) y establecer un plan de trabajo que pueda servir de insumo para la actualización del SG-SST.

Propósito del estudio: Este estudio busca conocer los factores asociados a la infección por COVID-19 en ambientes laborales

Método: Se realizará una encuesta anonimizada en donde se le realizarán preguntas como su edad, el estrato socioeconómico, sexo, nivel educativo, posibilidad de contacto con el Covid-19, entre otros.

En cualquier momento usted puede retirarse de manera unilateral del estudio, sin que le sea requerida una justificación. En

caso de tener preguntas o dudas puede contactar al investigador principal Dr. Jeadran Malagón-Rojas al correo: [jmalagon@ins.gov.co](mailto:jmalagon@ins.gov.co)



2. Autoriza usted a los investigadores a almacenar los datos proporcionados en una base anónima \*

*Marca solo un óvalo.*

- Sí  
 No

3. Autoriza usted a los investigadores a utilizar los datos proporcionados con fines investigativos \*

*Marca solo un óvalo.*

- Sí  
 No

4. Autoriza usted a los investigadores a ser contactado en el futuro para fases posteriores del estudio \*

*Marca solo un óvalo.*

- Sí  
 No

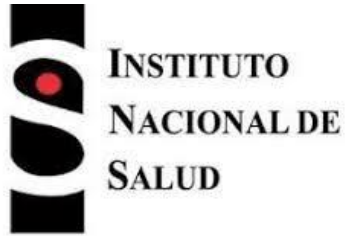

Información  
sociodemográfica

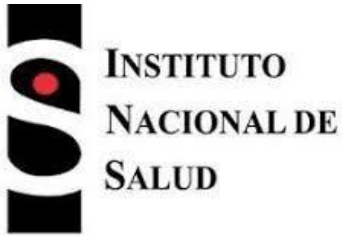

5. Nombres \*

---

6. Apellidos \*

---

7. Tipo de documento de identidad \*

*Marca solo un óvalo.*

Cédula de ciudadanía

Cédula de extranjería

8. Sexo \*

*Marca solo un óvalo.*

Masculino

Femenino

Otro

18/2/2021

COVID-19 y su transmisión en ambientes laborales, Colombia 2020

9. N° documento de identidad \*

---

10. Fecha de Nacimiento \*

*Ejemplo: 7 de enero del 2019*

---

11. Nombre de la empresa (Clínica u Hospital) en la que labora (dónde diligencia la encuesta) \*

---

18/2/2021

COVID-19 y su transmisión en ambientes laborales, Colombia 2020

## 12. Ciudad de residencia \*

*Selecciona todos los que correspondan.*

- Barranquilla  
 Bogotá  
 Bucaramanga  
 Cali  
 Cúcuta  
 Ipiales  
 Medellín  
 Guapi  
 Leticia  
 Villavicencio

Otro:  \_\_\_\_\_

## 13. Si su respuesta anterior fue otro, por favor escriba cual

\_\_\_\_\_

18/2/2021

COVID-19 y su transmisión en ambientes laborales, Colombia 2020

## 14. Estrato que aparece en su factura de electricidad \*

*Marca solo un óvalo.* 1 2 3 4 5 6

## 15. Pertenencia étnica \*

*Marca solo un óvalo.* Mestizo Blanco Afrocolombiano Indígena ROM Palenquero Raizal



18/2/2021

COVID-19 y su transmisión en ambientes laborales, Colombia 2020

## 16. Escolaridad más alta alcanzada \*

*Marca solo un óvalo.*

- Bachiller
- Técnico
- Tecnólogo
- Profesional
- Especialización
- Maestría
- Doctorado
- Otro

## 17. ¿Cuánto tiempo (MINUTOS) se demora en trasladarse de su casa a su lugar de trabajo? \*

---

18/2/2021

COVID-19 y su transmisión en ambientes laborales, Colombia 2020

18. ¿Cuál es el modo de transporte que usa para moverse de la casa a su lugar de trabajo? Hace referencia al PRINCIPAL modo de transporte, por ejemplo si usted usa transmilenio y alimentador, deberá poner transmilenio. \*

*Marca solo un óvalo.*

- Transporte público
- Vehículo particular (moto o automóvil)
- Bicicleta
- Caminando
- Ruta
- Otro

19. Tipo de Sangre y Rh \*

*Marca solo un óvalo.*

- O (+)
- O (-)
- A (+)
- A (-)
- B (+)
- B (-)
- AB (+)
- AB (-)

18/2/2021

COVID-19 y su transmisión en ambientes laborales, Colombia 2020

20. Con respecto al hábito de fumar o vapear (cigarrillo, pipa, tabaco, vapedor, cigarrillo electrónico), ¿usted es? \*

*Marca solo un óvalo.*

- Fumador
- No fumador
- Consumidor de vapedor o cigarrillo electrónico
- Exfumador (persona que dejó de fumar hace más de 1 año)

21. ¿Cuántas personas viven en su hogar? (incluyéndose) \*

*Marca solo un óvalo.*

- 1
- 2
- 3
- 4
- 5 o más

18/2/2021

COVID-19 y su transmisión en ambientes laborales, Colombia 2020

22. ¿Cuántas personas TRABAJAN en su hogar? (incluyéndose) \*

*Marca solo un óvalo.*

- 1
- 2
- 3
- 4
- 5 o más

23. La modalidad de trabajo de las demás personas que trabajan en el hogar es: \*

*Marca solo un óvalo.*

- Teletrabajo o trabajo en casa
- Semipresencial
- Presencial

24. ¿Cómo calificaría en general su estado de salud actual? (Califique de 1 a 5, donde 1 es muy pobre estado de salud y 5 es un excelente estado de salud) \*

*Marca solo un óvalo.*

|                       |                       |                       |                       |                       |
|-----------------------|-----------------------|-----------------------|-----------------------|-----------------------|
| 1                     | 2                     | 3                     | 4                     | 5                     |
| <input type="radio"/> |

18/2/2021

COVID-19 y su transmisión en ambientes laborales, Colombia 2020

## Caracterización de las condiciones de trabajo y exposición al COVID-19

25. En el último año ¿ha recibido la vacuna para la influenza? \*

*Selecciona todos los que correspondan.*

Si

No

18/2/2021

COVID-19 y su transmisión en ambientes laborales, Colombia 2020

## 26. Ocupación \*

*Marca solo un óvalo.*

- Médico(a) general
- Médico(a) especialista
- Jefe de enfermería
- Fisioterapeuta
- Terapeuta ocupacional
- Médico(a) residente
- Auxiliar de enfermería
- Instrumentadora
- Psicólogo(a)
- Estudiante
- Nutricionista
- Directivo
- Bacterióloga(o)
- Camillero
- Seguridad
- Servicios generales
- Tecnólogo en imágenes diagnósticas
- Técnico apoyo laboratorio
- Auxiliar de almacén
- Administrativo que TIENE contacto con pacientes
- Administrativo que NO TIENE contacto con pacientes (incluye personas de almacén, estadística, etc)

Técnico de sistemas

<https://docs.google.com/forms/d/12K6Y3gtIP1b6ZVZJGALCN1NZMBUWDGRyNwnRcaZ7UhU/edit>

14/27

18/2/2021

COVID-19 y su transmisión en ambientes laborales, Colombia 2020

Otro

27. Si en la anterior pregunta puso otro, ¿Cual es su cargo?

---

28. En la actualidad, ¿en cuantas instituciones de salud trabaja?

**Marca solo un óvalo.**

1

2

3

4 o más

18/2/2021

COVID-19 y su transmisión en ambientes laborales, Colombia 2020

29. En qué servicios del hospital trabaja la mayor parte del tiempo (puede marcar más de una opción) \*

*Selecciona todos los que correspondan.*

- Urgencias
- UCI (adultos, coronarios, trauma, etc)
- Hospitalización Adultos
- Área COVID
- Ginecoobstetricia
- Pediatría
- Salas de cirugía
- UCI Pediátrica
- Radiología e imágenes diagnósticas
- Consulta externa
- Epidemiología o estadística
- Auditoría de la calidad
- Almacén
- Gerencia

Otro:  \_\_\_\_\_

30. En promedio, ¿cuántas horas pasa en el trabajo durante la jornada laboral? \*

\_\_\_\_\_

31. Fecha del entrenamiento o capacitación más reciente que ha recibido sobre prevención del contagio por COVID-19 \*

*Ejemplo: 7 de enero del 2019* \_\_\_\_\_



18/2/2021

COVID-19 y su transmisión en ambientes laborales, Colombia 2020

32. ¿Cuál es el tiempo acumulado que ha tenido en este tipo de entrenamiento sobre prevención de la transmisión del COVID-19? \*

*Marca solo un óvalo.*

Menos de dos horas

Más de dos horas

33. ¿Con que elementos realiza la higienización de manos? \*

*Marca solo un óvalo.*

Solo con agua

Solo con gel

Agua y jabón

Agua, jabón y gel

Agua, jabón y alcohol

Agua, jabón, alcohol y gel

34. A su modo de ver ¿El gel antibacterial está disponible en cantidad suficiente? \*

*Marca solo un óvalo.*

Si

No

No sé

18/2/2021

COVID-19 y su transmisión en ambientes laborales, Colombia 2020

35. ¿Los EPP (elementos de protección personal) están disponibles en cantidad suficiente? \*

*Marca solo un óvalo.*

- Sí
- No
- No sé

36. ¿Qué tipo de tapabocas usa la mayor parte de la jornada laboral? \*

*Marca solo un óvalo.*

- Tapabocas desechable
- Tapabocas de tela
- Tapabocas N95
- Otro
- No uso tapabocas

18/2/2021

COVID-19 y su transmisión en ambientes laborales, Colombia 2020

37. ¿Cada cuanto cambia de tapabocas?

*Marca solo unóvalo.*

- Cada 4 horas o menos
- Entre 4 y 8 horas
- Una vez al día
- Entre 2 y 8 días
- Entre 8 y 15 días
- No lo cambia
- No uso tapabocas

18/2/2021

COVID-19 y su transmisión en ambientes laborales, Colombia 2020

38. ¿Qué tipo de guantes usa? \*

*Marca solo unóvalo.*

- Látex
- Nitrilo
- Caucho
- Tela
- Doble guante: Nitrilo y caucho encima
- Doble guante: nitrilo y látex encima
- Doble guante de nitrilo
- Otro tipo de guante simple
- Otro tipo de doble guante
- No uso guantes

18/2/2021

COVID-19 y su transmisión en ambientes laborales, Colombia 2020

39. ¿Cada cuanto cambia de guantes? \*

*Marca solo unóvalo.*

- Cada 4 horas o menos
- Entre 4 y 8 horas
- Una vez al día
- Entre 2 y 8 días
- Entre 8 y 15 días
- No lo cambia
- No uso guantes

40. ¿Qué otros elementos de protección personal usa? Puede marcar más de una opción \*

*Selecciona todos los que correspondan.*

- Gafas de seguridad
- Protector facial "full face" o careta
- Gorro
- Bata desechable
- Bata de tela
- Polainas
- Overol
- Botas de caucho
- Botas de seguridad
- Traje completo de bioseguridad desechable antifluídos
- Ninguno de los anteriores

18/2/2021

COVID-19 y su transmisión en ambientes laborales, Colombia 2020

41. ¿Como adquiere sus elementos de protección personal (EPP)?

*Marca solo un óvalo.*

- Se los da la empresa con la que trabaja
- Algunos se los da su empresa y otros los compra de su bolsillo
- Usted los compra de su bolsillo
- Otra persona o entidad se los suministra
- Otro: \_\_\_\_\_

42. ¿Debe reusar alguno de los elementos tras el contacto con pacientes con COVID-19? \*

*Selecciona todos los que correspondan.*

- Gafas de seguridad
- Protector facial "full face" o careta
- Gorro
- Bata desechable
- Bata de tela
- Polainas
- Overol
- Botas de caucho
- Botas de seguridad
- Traje completo de bioseguridad desechable antifluidos
- Ninguno de los anteriores

Percepción del riesgo de exposición al COVID-19

18/2/2021

COVID-19 y su transmisión en ambientes laborales, Colombia 2020

43. En un escala de 1 a 10, siendo 1 mínima exposición y 10 máxima exposición, ¿en su trabajo, qué tan expuesto se siente frente al coronavirus? \*

*Marca solo un óvalo.*

|                   |                       |                       |                       |                       |                       |                       |                       |                       |                       |                       |                   |
|-------------------|-----------------------|-----------------------|-----------------------|-----------------------|-----------------------|-----------------------|-----------------------|-----------------------|-----------------------|-----------------------|-------------------|
|                   | 1                     | 2                     | 3                     | 4                     | 5                     | 6                     | 7                     | 8                     | 9                     | 10                    |                   |
| Mínima exposición | <input type="radio"/> | Máxima exposición |

44. Dentro de las actividades EN su trabajo, ¿cuál considera que es la actividad en la que más riesgo tiene de contagio para coronavirus-19? \*

*Selecciona todos los que correspondan.*

- Atención de pacientes en Urgencias
- Atención de pacientes en piso
- Atención pacientes en UCI
- Atención de pacientes en áreas de consulta externa (incluye vacunación)
- Realización de procedimientos
- Limpieza de áreas y superficies
- Manipulación de muestras potencialmente contaminadas
- Comer con compañeros
- Actividades extramurales
- Otros

18/2/2021

COVID-19 y su transmisión en ambientes laborales, Colombia 2020

45. Dentro de las actividades que realiza FUERA de su trabajo (HOGAR, CALLE), ¿cuál considera que es la actividad en la que más riesgo tiene de contagio para coronavirus-19? \*

*Selecciona todos los que correspondan.*

- Hacer filas en supermercados, plazas de mercado
- Trámites (bancarios, notarias, etc)
- Visitar centros comerciales
- Salir a comer en restaurantes
- Realizar actividad física
- Recibir domicilios (mercados, alimentos, etc)
- Visitar amigos o familiares

46. ¿Qué emociones le produce la epidemia por coronavirus-19? \*

*Selecciona todos los que correspondan.*

- Miedo
- Sorpresa
- Angustia
- Desesperanza
- Alegría
- Tristeza
- Frustración
- Rabia
- Ninguna emoción

COVID-19 en trabajadores

A continuación se le harán preguntas frente a su estado actual de salud



18/2/2021

COVID-19 y su transmisión en ambientes laborales, Colombia 2020

47. En las últimas dos semanas le han hecho prueba para diagnóstico de COVID-19? \*

*Marca solo un óvalo.*

- No
- Sí, RT-PCR
- Sí, prueba rápida de sangre
- Sí, prueba rápida de antígeno
- Sí, RT-PCR y rápida de sangre

48. ¿Le han diagnosticado COVID-19? \*

*Marca solo un óvalo.*

- Sí
- No

49. Si su respuesta anterior fue SI, ¿requirió hospitalización?

*Marca solo un óvalo.*

- No
- Si, en piso
- Si, en UCI o intermedios

18/2/2021

COVID-19 y su transmisión en ambientes laborales, Colombia 2020

50. ¿Su enfermedad fue catalogada como ENFERMEDAD LABORAL? \*

*Marca solo un óvalo.*

Si

No

51. Fecha en el que se le hizo el diagnóstico de COVID-19

*Ejemplo: 7 de enero del 2019* \_\_\_\_\_

Antecedentes patológicos

18/2/2021

COVID-19 y su transmisión en ambientes laborales, Colombia 2020

52. ¿Su médico(o) le ha dicho que tiene alguna de las siguientes condiciones? (Puede marcar más de una) \*

*Selecciona todos los que correspondan.*

- Hipertensión arterial
- Diabetes Mellitus
- VIH o alguna otra inmunodeficiencia
- Enfermedad Pulmonar Obstructiva Crónica - EPOC -
- Enfermedad Hepática crónica
- Desórdenes hematológicos crónicos
- Enfermedad Renal Crónica
- Enfermedad Neurológica Crónica
- Transplante de órgano o médula ósea
- Cardiopatía
- Ninguno
- Otro

53. ¿Toma algún medicamento de forma regular?

*Marca solo un óvalo.*

- Sí
- No

54. En caso de haber respondido si a la anterior pregunta, ¿cuál(es)? (Si es más de uno escríbalos separados por comas)

---

18/2/2021

COVID-19 y su transmisión en ambientes laborales, Colombia 2020

¡Muchas gracias!

---

Este contenido no ha sido creado ni aprobado por Google.

Google Formularios
