# Supplementary material for: Seroprevalence of the SARS-CoV-2 antibody in healthcare workers: a multicentre cross-sectional study in 10 Colombian cities
Source: HighWire-hosted journal article supplement (doi:10.1136/oemed-2021-107487), 2021-11-05
Supplement: oemed-2021-107487supp003_data_supplement.pdf [file oemed-2021-107487supp003_data_supplement.pdf]

## Resumen

**Antecedentes:** el SARS-CoV-2 afecta principalmente a poblaciones de salud ocupacional. Los trabajadores de la salud corren un riesgo constante de infección. El objetivo de este estudio fue determinar la seroprevalencia del SARS-CoV-2 en trabajadores de la salud en Colombia.

**Métodos:** Este estudio es un estudio transversal enfocado en estimar la seroprevalencia de anticuerpos contra SARS-CoV-2 en trabajadores de la salud de 65 hospitales y clínicas en 10 ciudades de Colombia durante el segundo semestre de 2020. La seroprevalencia se determinó mediante un inmunoensayo automatizado (Abbott SARS-CoV-2 CLIA IgG). El estudio incluyó una encuesta para establecer las variables sociodemográficas y los factores de riesgo asociados a la infección.

**Resultados:** La seroprevalencia global de anticuerpos contra el SARS-CoV-2 fue del 35% (intervalo de confianza bayesiano del 95%: 33% -37%). Todo el personal informó el uso de equipo de protección. El personal de servicios generales y las enfermeras presentaron las tasas más altas de seroprevalencia entre los trabajadores de la salud. Trabajadores de los estratos socioeconómicos más bajos han mostrado una fuerte asociación con la seropositividad.

**Conclusión:** Este estudio muestra el riesgo ocupacional de infección por SARS-CoV-2 entre los trabajadores de la salud. Si bien todo el personal informó el uso de equipo de protección, la seroprevalencia en el personal de servicios generales y enfermeras fue alta. Además, se observó una diferencia significativa por ciudad. Se requiere una mayor investigación de estos para informar las fuentes de infección para mejorar las prácticas de control y salud ocupacional.
